# Supplementary material for: Non-traditional thermal behavior of Co(ii) coordination networks showing slow magnetic relaxation
Source: Royal Society of Chemistry journal article supplement (doi:10.1039/d1qi00667c), 2021-01-01
Supplement: d1qi00667c1.pdf [file d1qi00667c1.pdf]

Supporting Information

**Non-traditional thermal behavior of Co(II) coordination networks showing slow magnetic relaxation**

**Anna Świtlicka<sup>a\*</sup>, Barbara Machura<sup>a</sup>, Alina Bieńko<sup>b\*</sup>, Sandra Koziel<sup>b</sup>, Dariusz C. Bieńko<sup>c</sup>,  
Cyril Rajnák<sup>d</sup>, Roman Boča<sup>d</sup>, Andrew Ozarowski<sup>e</sup> and Mykhaylo Ozerov<sup>e</sup>**

<sup>a</sup> *Department of Crystallography, Institute of Chemistry, University of Silesia, 9<sup>th</sup> Szkolna St., 40-006 Katowice, Poland, E-mail: [anna.switlicka@us.edu.pl](mailto:anna.switlicka@us.edu.pl)*

<sup>b</sup> *Faculty of Chemistry, University of Wrocław, 14 F. Joliot-Curie, 50-383 Wrocław, Poland, E-mail: [alina.bienko@chem.uni.wroc.pl](mailto:alina.bienko@chem.uni.wroc.pl)*

<sup>c</sup> *Faculty of Chemistry, Wrocław University of Technology, Wybrzeże Wyspiańskiego 27, 50-370 Wrocław, Poland*

<sup>d</sup> *Department of Chemistry, Faculty of Natural Sciences, University of SS Cyril and Methodius, 91701 Trnava, Slovakia*

<sup>e</sup> *National High Magnetic Field Laboratory, Florida State University, 1800 East Paul Dirac Drive, Tallahassee, Florida 32310, United States*

Compounds under study

**1**, [Co(5,6-(Me)<sub>2</sub>-bzim)<sub>2</sub>(dca)<sub>2</sub>]<sub>n</sub>, C<sub>22</sub>H<sub>20</sub>N<sub>10</sub>Co (*M* = 483.41 g mol<sup>-1</sup>), CCDC 2085569

**2**, [Co(5-Mebzim)<sub>2</sub>(dca)<sub>2</sub>]<sub>n</sub>, C<sub>20</sub>H<sub>22</sub>N<sub>10</sub>Co (*M* = 461.40 g mol<sup>-1</sup>), CCDC 2085570

**3**, [Co(2-Mebzim)(dca)<sub>2</sub>]<sub>n</sub>, C<sub>20</sub>H<sub>16</sub>N<sub>10</sub>Co (*M* = 455.36 g mol<sup>-1</sup>), CCDC 2085571

|                                                                                                                                                                                                                                 |    |
|---------------------------------------------------------------------------------------------------------------------------------------------------------------------------------------------------------------------------------|----|
| Supporting Information.....                                                                                                                                                                                                     | 1  |
| 1. Synthesis and characterization.....                                                                                                                                                                                          | 3  |
| Figure S1. The powder XPRD pattern of <b>1</b> . ....                                                                                                                                                                           | 4  |
| Figure S2. The powder XPRD pattern of <b>2</b> . ....                                                                                                                                                                           | 4  |
| Figure S3. The powder XPRD pattern of <b>3</b> . ....                                                                                                                                                                           | 4  |
| Figure S7. UV/Vis spectra of <b>1–3</b> . ....                                                                                                                                                                                  | 6  |
| Table S1. Electronic spectral data for <b>1–3</b> .....                                                                                                                                                                         | 6  |
| 2. X-Ray structure data .....                                                                                                                                                                                                   | 7  |
| Table S2. Bond lengths [ $\text{\AA}$ ] and angles [ $^{\circ}$ ] in <b>1</b> .....                                                                                                                                             | 7  |
| Table S3. Bond lengths [ $\text{\AA}$ ] and angles [ $^{\circ}$ ] in <b>2</b> .....                                                                                                                                             | 7  |
| Table S4. Bond lengths [ $\text{\AA}$ ] and angles [ $^{\circ}$ ] in <b>3</b> .....                                                                                                                                             | 8  |
| Table S5. Short intra– and intermolecular contacts in the structures. ....                                                                                                                                                      | 8  |
| Table S6. Magneto-structural relationships in 1D cobalt(II)-dicyanamido complexes .....                                                                                                                                         | 9  |
| Table S7. Magneto-structural relationships of 2D cobalt(II)-dicyanamido complexes. ....                                                                                                                                         | 14 |
| 3. The HFEPR and FIRMS spectra.....                                                                                                                                                                                             | 21 |
| Figure S8. Blue traces: HF EPR spectra of compounds <b>1</b> and <b>2</b> recorded at similar conditions. ....                                                                                                                  | 21 |
| Figure S9. Blue traces: HF EPR spectra of compounds <b>3</b> . ....                                                                                                                                                             | 21 |
| 4. Selected AC susceptibility data .....                                                                                                                                                                                        | 22 |
| Figure S10. Field dependence of the AC susceptibility for <b>1</b> through <b>3</b> at $T = 2.0$ K for a set of trial frequencies. Lines – guide for eyes. ....                                                                 | 22 |
| Figure S11. Temperature dependence of the AC susceptibility for <b>1</b> through <b>3</b> at $B_{\text{DC}} = 0.2$ T for 22 frequencies of the oscillating field. ....                                                          | 23 |
| Figure S12. Frequency dependence of the AC susceptibility at $B_{\text{DC}} = 0.2$ T. Lines – fitted, using the two-set Debye model. ....                                                                                       | 24 |
| Figure S13. Argand plot (left) and the Arrhenius-like plot (right). Solid line – fitted with Raman-like and phonon-bottleneck terms $\tau^{-1} = CT^n + FT^l$ . ....                                                            | 25 |
| Figure S14. Various dependences of the high-frequency relaxation time. Dashed (dot-dashed) lines – linear fits to the high-temperature (low-temperature) windows. Solid – combined Raman-like and phonon-bottleneck terms. .... | 26 |

## 1. Synthesis and characterization

**Materials.** The reagents used to the synthesis were commercially available and they were used without further purification.

**Preparation of the complexes.** NaN(CN)<sub>2</sub> (0.075 g, 0.84 mmol) dissolved in water (5 cm<sup>3</sup>) was added to a deep pink methanolic solution of CoCl<sub>2</sub>·6H<sub>2</sub>O (0.10 g, 0.42 mmol) and suitable benzimidazole derivatives (0.84 mmol). The resulting mixture was filtered and allowed to evaporate at room temperature. X-ray quality pink crystals of **1–3** were grown after few days and they were collected by filtration and air-dried.

**[Co(5,6-(Me)<sub>2</sub>-bzim)<sub>2</sub>(dca)<sub>2</sub>]<sub>n</sub> (1):** Yield 80%. IR (KBr, cm<sup>-1</sup>): 3203(m) ν(N–H); 2274(s) ν<sub>as</sub> + ν<sub>s</sub>(C≡N<sub>dca</sub>); 2253(s) ν<sub>as</sub>(C≡N<sub>dca</sub>); 2187(vs) ν<sub>s</sub>(C≡N<sub>dca</sub>); 1507(m), 1399(m) and 1312(s) ν(C=N) and ν(C=C). Anal. calcd for C<sub>22</sub>H<sub>20</sub>N<sub>10</sub>Co (483.41 g/mol) C, 54.66, H, 4.17; N, 28.98; found C, 54.28, H, 4.04; N, 28.81%.

**[Co(5-Mebzim)<sub>2</sub>(dca)<sub>2</sub>]<sub>n</sub> (2)** Yield 75%. IR (KBr, cm<sup>-1</sup>): 3227(m) ν(N–H); 2276(s) ν<sub>as</sub> + ν<sub>s</sub>(C≡N<sub>dca</sub>); 2251(s) ν<sub>as</sub>(C≡N<sub>dca</sub>); 2185(vs) ν<sub>s</sub>(C≡N<sub>dca</sub>); 1503(m), 1408(m) and 1318(s) ν(C=N) and ν(C=C). Anal. calcd for C<sub>20</sub>H<sub>22</sub>N<sub>10</sub>Co (461.40 g/mol) C, 52.06; H, 4.81; N, 30.36 found C, 52.16; H, 4.52; N, 30.76%.

**[Co(2-Mebzim)(dca)<sub>2</sub>]<sub>n</sub> (3)** Yield 75%. IR (KBr, cm<sup>-1</sup>): 3368(m) ν(N–H); 2277(s) ν<sub>as</sub> + ν<sub>s</sub>(C≡N<sub>dca</sub>); 2248(s) ν<sub>as</sub>(C≡N<sub>dca</sub>); 2177(vs) ν<sub>s</sub>(C≡N<sub>dca</sub>); 1534(m), 1456(s) and 1322(s) ν(C=N) and ν(C=C). Anal. calcd for C<sub>20</sub>H<sub>16</sub>N<sub>10</sub>Co (455.36 g/mol) C, 52.76; H, 3.54; N, 30.76 found C, 52.55; H, 3.47; N, 30.80%.

**Physical techniques.** The UV-Vis spectra were recorded from solid state samples on Nicolet Evolution 220 and spectrophotometer Nicolet iS50 FT-IR in the ranges 190–1100 nm and 700–1500 nm, respectively (see ESI). IR spectra were recorded on a Nicolet iS5 spectrophotometer in the spectral range 4000–400cm<sup>-1</sup> with the samples as of KBr pellets. Elemental analysis was registered by Vario EL III apparatus (Elementar, Germany).

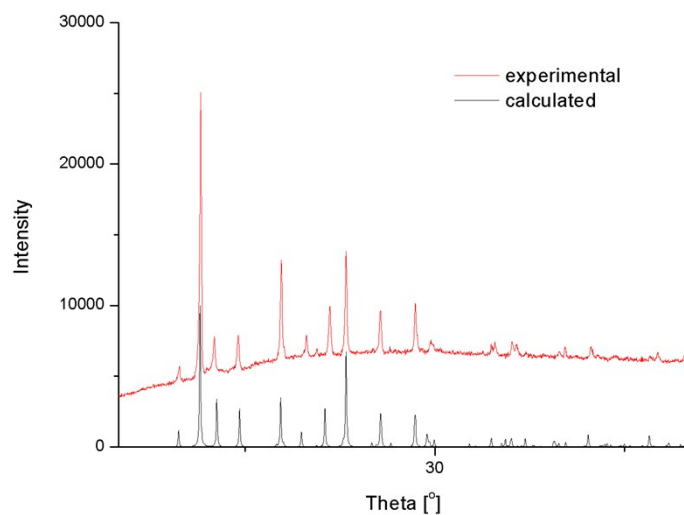

**Figure S1.** The powder XPRD pattern of **1**.

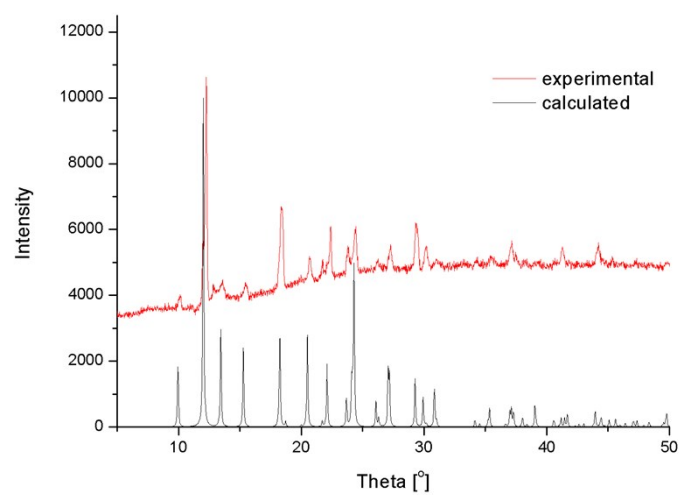

**Figure S2.** The powder XPRD pattern of **2**.

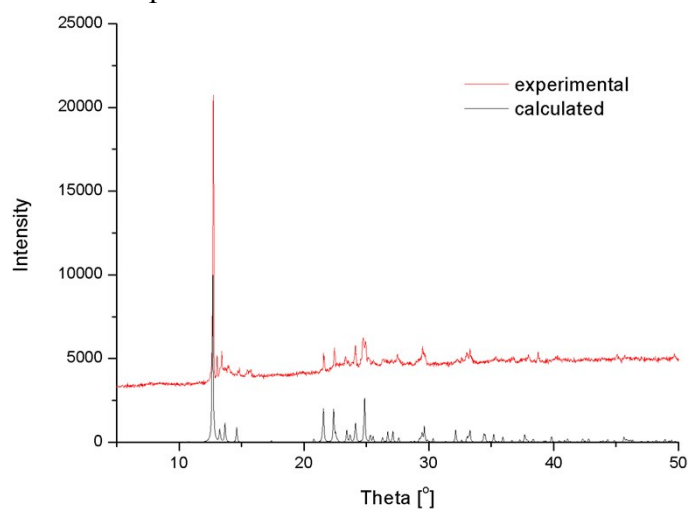

**Figure S3.** The powder XPRD pattern of **3**.



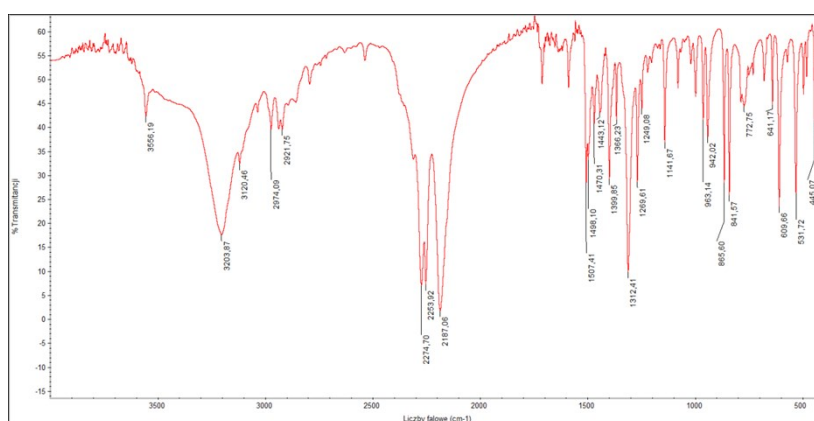

Figure S4. IR spectrum of 1.

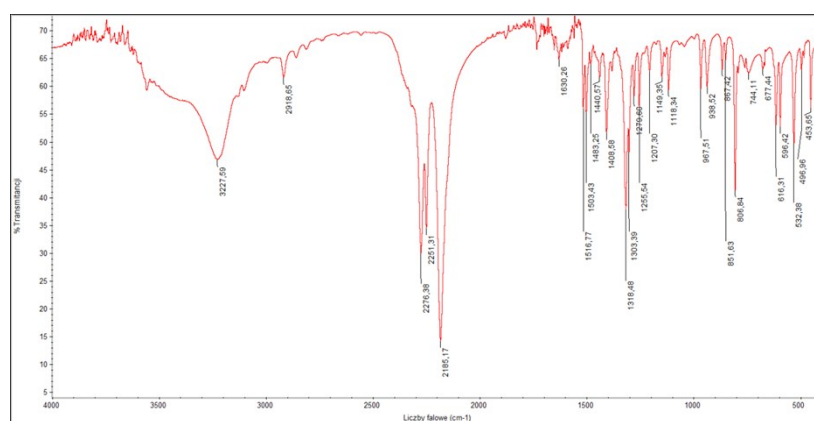

Figure S5. IR spectrum of 2.

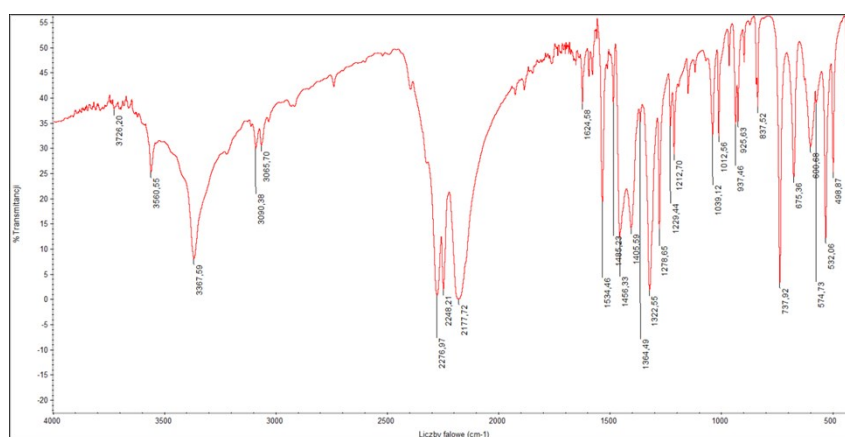

Figure S6. IR spectrum of 3.

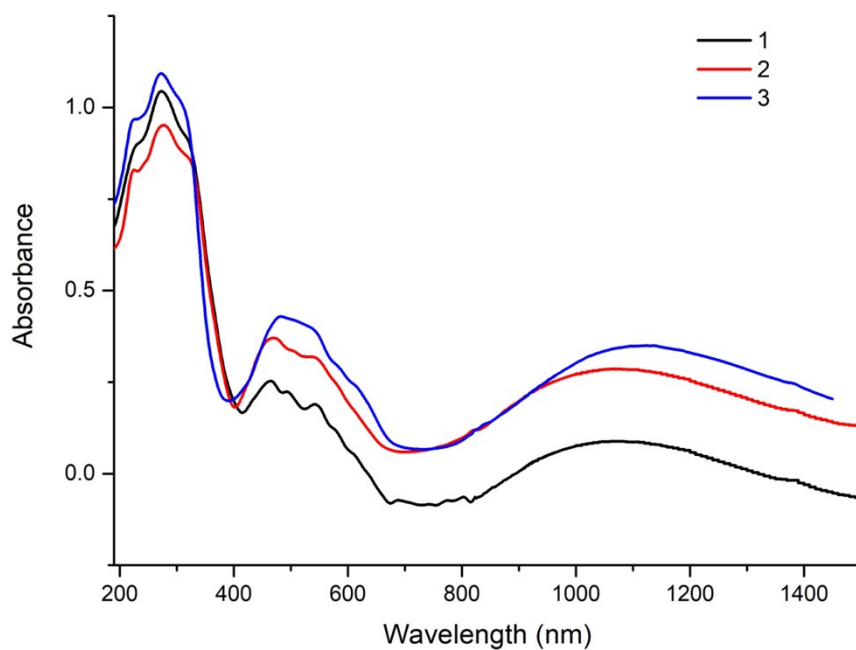

**Figure S7.** UV/Vis spectra of **1–3**.

**Table S1.** Electronic spectral data for **1–3**

| Compound | $\lambda_{max}/\text{nm}(\text{cm}^{-1})$                                                 | $Dq/\text{cm}^{-1}$ <sup>a</sup> | $B/\text{cm}^{-1}$ <sup>b</sup> |
|----------|-------------------------------------------------------------------------------------------|----------------------------------|---------------------------------|
| <b>1</b> | 1064 (9398), 546 (18315), 494 (20242), 465 (21505), 314 (31847), 275 (36363), 228 (43859) | 892                              | 691                             |
| <b>2</b> | 1056 (9469), 545 (18348), 499 (20040), 465 (21505), 322 (31055), 279 (35842), 226 (44247) | 888                              | 665                             |
| <b>3</b> | 1079 (9267), 543 (18416), 481 (20790), 307 (32573), 272 (36764), 225 (44445)              | 915                              | 760                             |

<sup>a</sup>  $10Dq$  – ligand field splitting parameter

<sup>b</sup>  $B$  – Racah parameter of the interelectmron repulsion.

## 2. X-Ray structure data

**Table S2.** Bond lengths [Å] and angles [°] in **1**

| Bond lengths |            | Bond angles         |            |
|--------------|------------|---------------------|------------|
| Co(1)–N(1)   | 2.1165(19) | N(1)–Co(1)–N(1)a    | 180.0      |
| Co(1)–N(1)a  | 2.1165(19) | N(1)–Co(1)–N(99)a   | 88.75(5)   |
| Co(1)–N(99)  | 2.1981(14) | N(1)a–Co(1)–N(99)a  | 91.25(5)   |
| Co(1)–N(99)a | 2.1981(14) | N(1)–Co(1)–N(99)b   | 91.25(5)   |
| Co(1)–N(99)b | 2.1981(14) | N(1)a–Co(1)–N(99)b  | 88.75(5)   |
| Co(1)–N(99)c | 2.1981(14) | N(99)a–Co(1)–N(99)b | 86.14(7)   |
|              |            | N(1)–Co(1)–N(99)c   | 88.75(5)   |
|              |            | N(1)a–Co(1)–N(99)c  | 91.25(5)   |
|              |            | N(99)a–Co(1)–N(99)c | 93.86(7)   |
|              |            | N(99)b–Co(1)–N(99)c | 180.00(5)  |
|              |            | N(1)–Co(1)–N(99)    | 91.25(5)   |
|              |            | N(1)a–Co(1)–N(99)   | 88.75(5)   |
|              |            | N(99)a–Co(1)–N(99)  | 180.0      |
|              |            | N(99)b–Co(1)–N(99)  | 93.86(7)   |
|              |            | N(99)c–Co(1)–N(99)  | 86.14(7)   |
|              |            | C(99)–N(99)–Co(1)   | 161.49(12) |
|              |            | C(99)–N(98)–C(99)b  | 120.20(18) |
|              |            | N(99)–C(99)–N(98)   | 175.43(15) |
|              |            | N(99)–C(99)–N(98)   | 175.1(2)   |

Symmetry codes: (a): 1-x,y,1-z; (b): 1-x,1-y,1-z; (c): x,1-y,z

**Table S3.** Bond lengths [Å] and angles [°] in **2**

| Bond lengths |          | Bond angles         |            |
|--------------|----------|---------------------|------------|
| Co(1)–N(1)   | 2.122(3) | N(1)–Co(1)–N(1)d    | 180.0      |
| Co(1)–N(1)d  | 2.122(3) | N(1)–Co(1)–N(99)e   | 90.30(7)   |
| Co(1)–N(99)  | 2.141(2) | N(1)d–Co(1)–N(99)d  | 90.30(7)   |
| Co(1)–N(99)d | 2.141(2) | N(1)–Co(1)–N(99)d   | 89.70(7)   |
| Co(1)–N(99)e | 2.141(2) | N(1)d–Co(1)–N(99)e  | 89.70(7)   |
| Co(1)–N(99)f | 2.141(2) | N(99)d–Co(1)–N(99)e | 89.69(11)  |
|              |          | N(1)–Co(1)–N(99)f   | 89.70(7)   |
|              |          | N(1)d–Co(1)–N(99)f  | 90.30(7)   |
|              |          | N(99)d–Co(1)–N(99)f | 90.31(11)  |
|              |          | N(99)e–Co(1)–N(99)f | 180.00(11) |
|              |          | N(1)–Co(1)–N(99)    | 90.30(7)   |
|              |          | N(1)d–Co(1)–N(99)   | 89.70(7)   |
|              |          | N(99)d–Co(1)–N(99)  | 180.0      |
|              |          | N(99)e–Co(1)–N(99)  | 90.31(11)  |
|              |          | N(99)f–Co(1)–N(99)  | 89.69(11)  |
|              |          | C(99)–N(99)–Co(1)   | 160.41(19) |
|              |          | C(99)e–N(98)–C(99)  | 117.8(3)   |

Symmetry codes: (d): -x,y,-z; (e): -x,-y,-z; (f): x,-y, z



**Table S4.** Bond lengths [Å] and angles [°] in **3**

| Bond lengths |            | Bond angles         |            |
|--------------|------------|---------------------|------------|
| Co(1)–N(1)   | 2.1513(18) | N(1)–Co(1)–N(1)g    | 180.0      |
| Co(1)–N(1)g  | 2.1513(18) | N(1)–Co(1)–N(97)    | 92.63(7)   |
| Co(1)–N(97)  | 2.1445(19) | N(1)–Co(1)–N(97)g   | 87.37(7)   |
| Co(1)–N(97)g | 2.1445(19) | N(1)–Co(1)–N(99)    | 93.25(7)   |
| Co(1)–N(99)  | 2.1405(19) | N(1)–Co(1)–N(99)g   | 86.75(7)   |
| Co(1)–N(99)  | 2.1405(19) | N(1)g–Co(1)–N(99)   | 86.75(7)   |
|              |            | N(1)g–Co(1)–N(99)g  | 93.25(7)   |
|              |            | N(1)g–Co(1)–N(97)   | 87.37(7)   |
|              |            | N(1)g–Co(1)–N(97)g  | 92.63(7)   |
|              |            | N(99)–Co(1)–N(97)   | 93.98(7)   |
|              |            | N(99)g–Co(1)–N(97)  | 86.02(7)   |
|              |            | N(99)–Co(1)–N(97)g  | 86.02(7)   |
|              |            | N(99)g–Co(1)–N(97)g | 93.98(7)   |
|              |            | N(99)–Co(1)–N(99)g  | 180.0      |
|              |            | N(97)–Co(1)–N(97)g  | 180.0      |
|              |            | C(98)–N(97)–Co(1)   | 151.16(18) |
|              |            | C(99)–N(99)–Co(1)   | 160.73(19) |
|              |            | N(99)–C(99)–N(98)   | 173.2(2)   |
|              |            | N(97)–C(98)–N(98)g  | 173.4(2)   |
|              |            | C(98)g–N(98)–C(99)  | 119.7(2)   |

Symmetry codes: (g): 1-x,-y,1-z

**Table S5.** Short intra- and intermolecular contacts in the structures.

| D—H...A                        | D—H  | H...A | D...A<br>[Å] | D—H...A<br>[°] |
|--------------------------------|------|-------|--------------|----------------|
| <b>1</b>                       |      |       |              |                |
| N(2)–H(2)...N(99) <sup>h</sup> | 0.86 | 2.13  | 2.979(3)     | 169.0          |
| <b>2</b>                       |      |       |              |                |
| N(2)–H(2)...N(98) <sup>i</sup> | 0.86 | 2.16  | 2.983(5)     | 159.0          |
| <b>3</b>                       |      |       |              |                |
| N(2)–H(2)...N(98) <sup>j</sup> | 0.86 | 2.34  | 3.104(3)     | 149.0          |

Symmetry elements: (h): -1/2+x,1/2+y, z; (i): 1/2-x,-1/2+y,-z; (j): 1/2+x,1/2-y,-1/2+z

**Table S6.** Magneto-structural relationships in 1D cobalt(II)-dicyanamido complexes

| Compound /                                                                                                         | Co–N <sub>L</sub> /Co–O                                                                                                                    | Co–N <sub>dca</sub>                                                                            | Co···Co                                                               | Magnetic properties                                                                | Ref. |
|--------------------------------------------------------------------------------------------------------------------|--------------------------------------------------------------------------------------------------------------------------------------------|------------------------------------------------------------------------------------------------|-----------------------------------------------------------------------|------------------------------------------------------------------------------------|------|
| <b>single <math>\mu</math>-1,5-dca bridge</b>                                                                      |                                                                                                                                            |                                                                                                |                                                                       |                                                                                    |      |
| [Co(L <sup>1</sup> ) <sub>4</sub> (dca)] <sub>n</sub> (ClO <sub>4</sub> ) <sub>n</sub> ·4n(EtOH)·nH <sub>2</sub> O | 2.121(4)<br>2.121(4)                                                                                                                       | 2.088(8)<br>2.063(9)                                                                           | 8.6090(5)                                                             | C = 3.32 cm <sup>3</sup> mol <sup>-1</sup> K<br>Θ = -31.8 K<br>weak AF interaction | 1    |
| [Co(hypy) <sub>2</sub> (dca)(MeOH) <sub>2</sub> ] <sub>n</sub>                                                     | 2.138(3)<br>2.138(3)<br>Co–O= 2.123(3)<br>Co–O= 2.123(3)                                                                                   | 2.103(4)<br>2.103(4)                                                                           | 8.665                                                                 | C = 3.123 cm <sup>3</sup> mol <sup>-1</sup> K,<br>Θ = -16.29 K.                    | 13   |
| [Co(biim) <sub>2</sub> (dca) <sub>2</sub> ]Cl                                                                      | 2.1386(18)<br>2.1593(18)<br>2.1372(18)<br>2.1325(18)                                                                                       | 2.1133(19)<br>2.1900(19)                                                                       | 7.286                                                                 | D = 40.3cm <sup>-1</sup> ,<br>J/kB = 20.05 cm <sup>-1</sup>                        | 17   |
| [Co(enbzy)(dca)] <sub>n</sub> (ClO <sub>4</sub> ) <sub>n</sub>                                                     | room temperature<br>2.102(3)<br>2.083(3)<br>2.023(3)<br>2.028(3)<br><b>low temperature</b><br>2.138(8)<br>2.074(8)<br>2.089(8)<br>2.133(8) | room temperature<br>2.092(3)<br>2.136(3)<br><br><b>low temperature</b><br>2.141(9)<br>2.073(8) | 8.57                                                                  | SCO                                                                                | 18   |
| [Co(enbzy)(dca)] <sub>n</sub> (PF <sub>6</sub> ) <sub>n</sub>                                                      | <b>room temperature</b><br>2.109(5)<br>2.045(4)<br>2.034(9)<br>2.097(4)<br><b>Low temperature</b><br>2.039(6)<br>1.921(6)                  | <b>room temperature</b><br>2.127(5)<br>2.134(5)<br><br><b>Low temperature</b><br>2.163(7)      | <b>room temperature</b><br>8.699 Å<br><b>low temperature</b><br>8.718 | SCO                                                                                | 20   |

|                                                                              |                                                                                                                            |                                                                      |                    |                                                                    |    |
|------------------------------------------------------------------------------|----------------------------------------------------------------------------------------------------------------------------|----------------------------------------------------------------------|--------------------|--------------------------------------------------------------------|----|
|                                                                              | 1.916(6)<br>2.043(7)                                                                                                       | 2.181(8)                                                             |                    |                                                                    |    |
| [Co(bpym)(dca) <sub>2</sub> ] $\cdot$ H <sub>2</sub> O                       | 2.151(3)<br>2.151(3)<br>Co-O <sub>H<sub>2</sub>O</sub> =2.124(4)                                                           | 2.092(4)<br>2.103(5)                                                 | 8.649              | $J = -1.42$<br>$\Theta = -5.4$ K                                   | 21 |
| [Co(L <sup>5</sup> )(dca)] <sub>n</sub>                                      | 1.985 (4)<br>1.951 (3)<br>Co-O=1.965 (3)                                                                                   | 1.956 (4)<br>2.330 (5)                                               | 5.949              | $J = -3.52$ cm <sup>-1</sup>                                       | 4  |
| [Co(L <sup>9</sup> )(dca) <sub>2</sub> ] <sub>n</sub>                        | 2.086(2)<br>2.240(2)<br>2.154(2)<br>2.042(3)                                                                               | 2.164(2)<br>2.098(2)                                                 | 8.542              | $C = 2.8-3.4$ cm <sup>3</sup> mol <sup>-1</sup> K<br>$J = -0.21$ K | 9  |
| [Co(tpz)(dca)(H <sub>2</sub> O)](dca)                                        | 2.213(2)<br>2.078(2)<br>2.221(2)<br>Co- O <sub>H<sub>2</sub>O</sub> = 2.005(2)                                             | 2.104(2)<br>2.096(2)                                                 | 8,465              | $\theta = 7.97$ K<br>$C = 2.59$ cm <sup>3</sup> Kmol <sup>-1</sup> | 22 |
| [Co(L <sup>7</sup> )(dca)(ClO <sub>4</sub> ) <sub>2</sub> MeOH] <sub>n</sub> | Co(A)<br>2.1619(19)<br>2.0785(19)<br>2.1011(18)<br>2.1323(19)<br>Co(B)<br>2.141(2)<br>2.1017(19)<br>2.097(2)<br>2.1661(19) | Co(A)<br>2.1828(18)<br>2.0851(19)<br>Co(B)<br>2.1013(18)<br>2.089(2) | 8.451 Å<br>8.532 Å | lack of significant<br>magnetic interactions                       | 6  |
| <b>double <math>\mu</math>-1,5-dca bridge</b>                                |                                                                                                                            |                                                                      |                    |                                                                    |    |
| [Co(im) <sub>2</sub> (dca) <sub>2</sub> ] <sub>n</sub>                       | 2.095(2)<br>2.095(2)                                                                                                       | 2.157(2)<br>2.157(2)<br>2.153(2)<br>2.153(2)                         | 7.359              | $C = 2.8-3.4$ cm <sup>3</sup> mol <sup>-1</sup><br>$J = -24.8$ K   | 5  |
| [Co(im) <sub>2</sub> (dca) <sub>2</sub> ] <sub>n</sub>                       | 2.101(2)                                                                                                                   | 2.161(2)                                                             | 7.395(1)           | $C = 2.8-3.4$ cm <sup>3</sup> K mol <sup>-1</sup>                  | 11 |

|                                                                            |                                    |                                                                      |          |                                                                                                                  |    |
|----------------------------------------------------------------------------|------------------------------------|----------------------------------------------------------------------|----------|------------------------------------------------------------------------------------------------------------------|----|
|                                                                            | 2.101(2)                           | 2.161(2)<br>2.164(3)<br>2.164(3)                                     |          | $J = -1.0 \text{ K}$                                                                                             |    |
| $[\text{Co}(\text{ampy})_2(\text{dca})_2]$                                 | 2.193(3)<br>2.193(3)               | 2.126(2)<br>2.126(2)<br>2.128(2)<br>2.128(2)                         |          | –                                                                                                                | 2  |
| $[\text{Co}(\text{4omp})_2(\text{dca})_2]_n$                               | 2.126(4)<br>2.126(4)               | 2.116(4)<br>2.116(4)<br>2.124(5)<br>2.124(5)                         | 7.076(3) | $C = 3.58 \text{ cm}^3 \text{ mol}^{-1}$<br>$\Theta = -15.5 \text{ K}$                                           | 14 |
| $[\text{Co}(\text{pyr})_2(\text{dca})_2]_n$                                | Co-O = 2.097(2)<br>Co-O = 2.072(3) | 2.084 (3)<br>2.084 (3)<br>2.099 (2)<br>2.099 (2)                     | 7.220    | weak antiferromagnetic<br>interaction                                                                            | 15 |
| $[\text{Co}(\text{mepy})_2(\text{dca})_2]_n$                               | 2.1229 (18)<br>2.1229 (18)         | 2.1385 (17)<br>2.1385 (17)<br>2.1385 (17)<br>2.1385 (17)             | 7.305(1) |                                                                                                                  | 24 |
| $[\text{Co}(\text{4-nic})_2(\text{dca})_2]_n \cdot 2n\text{CH}_3\text{OH}$ | 2.157(2)<br>2.157(2)               | 2.114(3)<br>2.114(3)<br>2.128(2)<br>2.128(2)                         | 7.353    | $C = 3.58 \text{ cm}^3 \cdot \text{mol}^{-1} \cdot \text{K}$ ,<br>$\theta = -17.8 \text{ K}$                     | 26 |
| $[\text{Co}(\text{dca})_2(\text{H}_2\text{O})_2]_n \cdot (\text{hmt})_n$   | Co- O <sub>H2O</sub> = 2.082(1)    | 2.122(2)<br>2.118(2)                                                 | 7.362    | $J = -0.50 \text{ cm}^{-1}$                                                                                      | 3  |
| $(\text{Ph}_4\text{P})[\text{Co}(\text{dca})_4]$                           | –                                  | 2.176(3)<br>2.091(3)<br>2.165(3)<br>2.176(3)<br>2.091(3)<br>2.165(3) | 7.589(1) | $C = 1.394 \text{ cm}^3 \text{ mol}^{-1}$<br>$\Theta = +0.1 \text{ K}$<br>very weak ferromagnetic<br>interaction | 7  |

|                                                                                |                                                                                 |                                                      |           |                                                                                |    |
|--------------------------------------------------------------------------------|---------------------------------------------------------------------------------|------------------------------------------------------|-----------|--------------------------------------------------------------------------------|----|
| $[\text{Co}(\text{phen})(\text{dca})_2(\text{H}_2\text{O})\cdot\text{MeOH}]_n$ | 2.210(2)<br>2.210(2)<br>2.126(2)<br>2.112(2)<br>Co- O <sub>H2O</sub> = 2.127(2) | 2.106(2)<br>2.102(2)                                 | 7.3244(5) | –                                                                              | 8  |
| $[\text{Co}(\text{bipy})(\text{dca})_2]_n$                                     | 2.129(2)<br>2.129(2)                                                            | 2.134(2)<br>2.134(2)<br>2.102(2)<br>2.102(2)         | 7.375(1)  | D= 93.7cm <sup>-1</sup>                                                        | 12 |
| $[\text{Co}(\text{mepypz})_2(\text{dca})_2]_n$                                 | Co-O= 2.109(2)<br>Co-O= 2.109(2)                                                | 2.122(3)<br>2.122(3)<br>2.102(3)<br>2.102(3)         | 7.379(3)  | –                                                                              | 16 |
| $[\text{Co}(\text{pydz})_2(\text{dca})_2]_n$                                   | 2.166(2)<br>2.166(2)                                                            | 2.1095(14)<br>2.1095(14)<br>2.1095(14)<br>2.1095(14) | 7.3409(5) | weak AF interaction<br>C=3.46 cm <sup>3</sup> K mol <sup>-1</sup><br>Θ= -20.46 | 19 |
| $[\text{Co}(\text{L}^{21})_2(\text{dca})_2]_n$                                 | 2.154(3)<br>2.154(3)                                                            | 2.130(3)<br>2.130(3)<br>2.122(3)<br>2.122(3)         | 7.481(1)  | –                                                                              | 23 |
| $\{[\text{Co}(\text{bpm})_2(\text{dca})](\text{ClO}_4)\}_n$                    | 2.141(4)<br>2.141(4)                                                            | 2.103(5)<br>2.103(5)<br>2.103(5)<br>2.103(5)         | 7.592     | -                                                                              | 25 |
| <b>double μ-1,5-dca bridge and N-donor ligand</b>                              |                                                                                 |                                                      |           |                                                                                |    |
| $[\text{Co}(\text{bpds})(\text{dca})_2]_n$                                     | 2.180(5)<br>2.180(5)                                                            | 2.143(5)<br>2.142(5)<br>2.143(5)<br>2.142(5)         | 7.302     | J = -0.95 cm <sup>-1</sup>                                                     | 3  |
| $[\text{Co}_2(\text{tppz})(\text{dca})_4]_n$                                   | 2.156(2)<br>2.156(2)                                                            | 2.044(2)<br>2.044(2)                                 | 7.377 A   | J = -1.10 cm <sup>-1</sup>                                                     | 10 |

|  |          |          |  |  |  |
|--|----------|----------|--|--|--|
|  | 2.114(2) | 2.141(2) |  |  |  |
|  | 2.114(2) | 2.141(2) |  |  |  |
|  | 2.140(2) |          |  |  |  |
|  | 2.140(2) |          |  |  |  |

**L**<sup>1</sup>= 4-(imidazol-1-yl)phenol; **L**<sup>2</sup>= anion N-(picolinoyl)biurate; **L**<sup>3</sup>= (N,N-diethyl,N'-(pyridin-2-yl)benzylidene)ethane-1,2-diamine; **L**<sup>4</sup> = N<sup>4</sup>-Schiff base ligand; **ampy**= 2-aminopyridine; **hmt**= hexamethylenetetramine; **bpds**= 4,4'-bipyridyl disulfide;; **im**=imidazole; **phen**=4,7-phenanthroline; **tppz**= tetra-2-pyridylpyrazine; **bipy**= 4,4'-bipyridine; **hypy**= 3-hydroxypyridine; **pyr**=2-pyrrolidone; **mepypz**= 3,5-dimethyl-1-(2-pyridyl)pyrazole; **biim**= 2,2'-biimidazole; **enbzipy**= N,N'-bis(2-pyridinylbenzylidene)ethane-1,2-diamine; **pydz** = pyridazine, **bpym**= bipyrimidine; **tpz**= 2,4,6-tri(2-pyridyl)-1,3,5-triazine; **L**<sup>5</sup>= 4-picoyl choride); **mepy**= 4-methylpyridine; **bpm**= bis(3,5-dimethyl)pyrazolylmethane; **4omp** = 4-methoxypyridine; **4-nic**= isonicotinamide

1. L. Zheng, S. Hu, A. Zhou, *Trans. Met. Chem.*, 2015, 40, 637–642.
2. A. C. B. Yuoh, M. Ondoh Agwara, D. Mbom Yufanyi, M. Aseng Conde, R. Jagan, K. Oben Eyong, *Internat. J. Inorg. Chem.*, 2015, 1–8.
3. S. C. Manna, A. Kumar Ghosh, J. Ribas, M. G.B. Drew, C.-N. Lin, E. Zangrando, N. Ray Chaudhuri, *Inorg. Chim. Acta*, 2006, 359, 1395–1403.
4. M. Biswas, G. Pilet, M. S. El Fallah, J. Ribas, S. Mitra, *Inorg. Chim. Acta*, 2008, 361, 387–392.
5. R. Sen, A. Bhattacharjee, P. Gütllich, Y. Miyashita, K.-I. Okamoto, S. Koner, *Inorg. Chim. Acta*, 2009, 362, 4663–4670.
6. S. Banerjee, S. Halder, P. Brandão, C. J. Gómez García, S. Benmansour, A. Saha, *Inorg. Chim. Acta*, 2017, 464, 65–73.
7. L. Jäger, C. Wagner, M. Korabik, A. Zygumt, J. Mroziński, *J. Mol., Struct.*, 2001, 570, 159–164.
8. D. S. Tonzing, S. R. Batten, K. S. Murray, *J. Mol. Struct.*, 2006, 796, 63–68.
9. S. Kundu, S. Roy, K. Bhar, R. Ghosh, C.-H. Lin, J. Ribas, B. Kumar Ghosh, *J. Mol. Struct.*, 2013, 1038, 78–85.
10. G.-Y. Hsu, C.-W. Chen, S.C. Cheng, S.-H. Lin, H.-H. Wei, C.-J. Lee, *Polyhedron*, 2005, 24, 487–494.
11. A. Das, C. Marschner, J. Cano, J. Baumgartner, J. Ribas, M. Salah El Fallah, S. Mitra, *Polyhedron*, 2009, 28, 2436–2442.
12. L. Vahovska, I. Potočňak, S. Vitushkina, M. Dušek, J. Titiš, R. Boča, *Polyhedron*, 2014, 81, 396–408.
13. L. Ling Zheng, C. Xia Zhou, S. Hu, A. J. Zhou, *Polyhedron*, 2016, 104, 91–98.
14. F. A. Mautner, M. Traber, R. C. Fischer, S. S. Massoud, R. Vicente, *Polyhedron*, 2017, 138, 13–20.
15. B.-Wa. Sun, So. Gao, B.-Q. Ma, Z.-M. Wang, *Inorg. Chem. Commun.*, 2001, 4, 72–75.
16. P. Pal, S. Konar, P. Lama, K. Das, A. Bauza, A. Frontera, S. Mukhopadhyay, *J. Phys. Chem. B*, 2016, 120, 6803–6811.
17. S. R. Marshall, C. D. Incarvito, W. W. Shum, A. L. Rheingold, J.S. Miller, *Chem. Commun.*, 2002, 3006–3007.
18. K. Bhar, S. Khan, J. Sanchez Costa, J. Ribas, O. Roubeau, P. Mitra, B. Kumar Ghosh, *Angew. Chem. Int. Ed.*, 2012, 51, 2142–2145.
19. M. Wriedt, C. Näther, *Dalton Trans.*, 2011, 40, 886–898.
20. S. Roy, S. Choubey, K. Bhar, N. Sikdar, J. Sánchez Costa, P. Mitra, B. Kumar Ghosh, *Dalton Trans.*, 2015, 44, 7774–7776.

21. S. R. Marshall, C. D. Incarvito, J.L. Manson, A. L. Rheingold, J. S. Miller, *Inorg. Chem.* 2000, 39, 1969-1973.
22. J. Luo, L. Qiu, B. Liu, X. Zhang, F. Yang, L. Cui, *Chin. J. Chem.*, 2012, 30, 522–528.
23. H. Pei, S. Lu, J. Li, Y. Sun, X. Wu, W. Du, *Cryst. Res. Technol.*, 2006, 41, 423–426.
24. W. Huang, J. Zhang, C. Zhang *Acta Cryst.*, 2013, E69, m90.
25. W.-Z. Shen, X.-Y. Chen, P. Cheng, D.-Z.Liao, S.-P. Yan, Z.-H. Jiang, *Z. Anorg. Allg. Chem.*, 2003, 629, 2591–2595.
26. L.-L. Zheng, X.-M. Zhuang, *Z. Anorg. Allg. Chem.*, 2010, 636, 2500–2507.

**Table S7.** Magneto-structural relationships of 2D cobalt(II)-dicyanamido complexes.

| Compound/                                                                | topology                                                                           | Co–N <sub>I</sub> /Co–<br>O                                    | Co–N <sub>dca</sub>                                  | Co···Co              | Magnetic<br>properties                                                                                             | Ref. |
|--------------------------------------------------------------------------|------------------------------------------------------------------------------------|----------------------------------------------------------------|------------------------------------------------------|----------------------|--------------------------------------------------------------------------------------------------------------------|------|
|                                                                          |                                                                                    | <b>single <math>\mu_{1,5}</math>-dca</b>                       |                                                      |                      |                                                                                                                    |      |
| [Co(bzim) <sub>2</sub> (dca) <sub>2</sub> ] <sub>n</sub>                 | 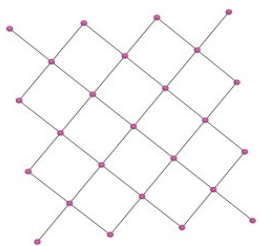  | 2.1492(16)<br>2.1492(16)                                       | 2.1152(17)<br>2.1152(17)<br>2.1427(18)<br>2.1427(18) | 7.623                | $\Theta = 17.14$ K<br>$C = 3.17$ cm <sup>3</sup> K mol <sup>-1</sup>                                               | 27   |
| [Co(pte) <sub>2</sub> (dca) <sub>2</sub> ] <sub>n</sub>                  |  | 2.169(2)<br>2.169(2)                                           | 2.097(2)<br>2.097(2)<br>2.146(2)<br>2.146(2)         | 8.5739               | $C = 3.13$ cm <sup>3</sup> K<br>mol <sup>-1</sup><br>$\Theta = -9.1$ K<br>weak<br>antiferromagnetic<br>interaction | 28   |
| [Co <sub>2</sub> (4-cypy) <sub>4</sub> (dca) <sub>4</sub> ] <sub>n</sub> |  | Co(1)<br>2.179(7)<br>2.156(6)<br>Co(2)<br>2.149(6)<br>2.181(6) | 2.122(6)<br>2.079(6)                                 | 8.037(3)<br>7.745(3) | $J = -1.14$ K                                                                                                      | 30   |



|                                                                                                      |                                                                                    |                                                |                                                      |            |                                                                                |    |
|------------------------------------------------------------------------------------------------------|------------------------------------------------------------------------------------|------------------------------------------------|------------------------------------------------------|------------|--------------------------------------------------------------------------------|----|
|                                                                                                      | 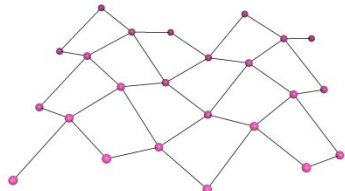 |                                                |                                                      |            |                                                                                |    |
| [Co(dmdpy)(dca) <sub>2</sub> ]                                                                       |   | 2.142(2)<br>2.142(2)                           | 2.114(2)<br>2.095(3)<br>2.114(2)<br>2.095(3)         | 8.102(4)   | weak magnetic interaction                                                      | 32 |
| {[Co(ambzim) <sub>2</sub> (dca) <sub>4</sub> ]} <sub>n</sub>                                         |   | 2.1171(13)<br>2.1171(13)                       | 2.1520(13)<br>2.1520(13)<br>2.1591(15)<br>2.1591(15) | 8.186 Å    | –                                                                              | 33 |
| {[Co(L <sup>6</sup> ) <sub>2</sub> (dca) <sub>2</sub> ] <sub>2</sub> (L <sup>6</sup> )} <sub>n</sub> |   | Co-Owoda=<br>2.057(5)<br>Co-Owoda=<br>2.057(5) | 2.124(7)<br>2.124(7)<br>2.124(6)<br>2.124(6)         | 7.894(1)   | –                                                                              | 34 |
| [Co(4NOpy) <sub>2</sub> (dca) <sub>2</sub> (CH <sub>3</sub> CN)] <sub>n</sub>                        |  | 2.149, 2.162                                   | 2.106,<br>2.107,<br>2.110, 2.112                     | 8.13, 8.16 | J= -0.8<br>weak signals for<br>both χ <sub>mol</sub> ' and<br>χ <sub>mol</sub> | 35 |

|                                                                |                                                                                    |                          |                                                      |                        |                                                                                                                         |    |
|----------------------------------------------------------------|------------------------------------------------------------------------------------|--------------------------|------------------------------------------------------|------------------------|-------------------------------------------------------------------------------------------------------------------------|----|
| $[\text{Co}(\text{atz})_2(\text{dca})_2]_n$                    | 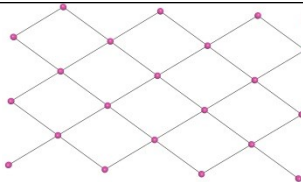  | 2.1677(15)<br>2.1677(15) | 2.0887(17)<br>2.0968(16)<br>2.0887(17)<br>2.0968(16) | 8.041                  | $\tau_0 = 1.7 \cdot 10^{-6} \text{ s}$<br>$E_a = 5.1 \text{ cm}^{-1}$<br><b>SIM</b>                                     | 38 |
| $[\text{Co}(\text{bim})_2(\text{dca})_2]_n$                    |   | 2.128(3)<br>2.134(3)     | 2.190(3)<br>2.220(3)<br>2.209(3)<br>2.219(3)         | 8.927(2)<br>8.968(2)   | $ D  = 74.3 \text{ cm}^{-1}$<br>$\tau_0 = 1.54 \cdot 10^{-6} \text{ s}$<br>$E_a = 5.33 \text{ cm}^{-1}$<br><b>SIM</b>   | 39 |
| $[\text{Co}(\text{bmim})_2(\text{dca})_2]_n$                   |   | 2.156(3)<br>2.163(3)     | 2.127(3)<br>2.153(3)<br>2.152(3)<br>2.145(3)         | 8.7110(5)<br>8.7158(5) | $ D  = 75.8 \text{ cm}^{-1}$<br>$\tau_0 = 0.63 \times 10^{-6} \text{ s}$<br>$E_a = 13.81 \text{ cm}^{-1}$<br><b>SIM</b> | 39 |
| $[\text{Co}(\text{mepyz})_2(\text{dca})_2] \text{H}_2\text{O}$ |  | 2.1553(12)<br>2.1553(12) | 2.1210(12)<br>2.1008(12)<br>2.1210(12)<br>2.1008(12) | 8.318(6)               | $\mu_{\text{eff}} 4.95 \mu_B$                                                                                           | 40 |

double  $\mu_{1,5}$ -dca + single  $\mu_{1,5}$ -dca

|                                                   |                                                                                      |                          |                                                      |                        |                                                          |    |
|---------------------------------------------------|--------------------------------------------------------------------------------------|--------------------------|------------------------------------------------------|------------------------|----------------------------------------------------------|----|
| $(\text{Ph}_4\text{As})[\text{Co}(\text{dca})_3]$ | 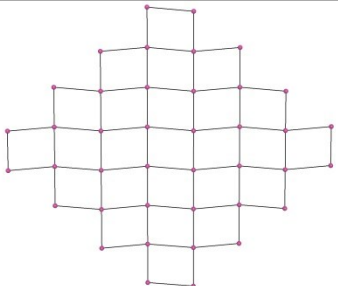   | –                        | 2.121<br>2.121<br>2.110<br>2.110<br>2.140<br>2.140   | 7.370<br>8.650         | no long-range<br>magnetic interaction                    | 31 |
| $[\text{Co}(\text{phen})(\text{dca})_2]_n$        |    | 2.1344(14)<br>2.1209(13) | 2.1346(16)<br>2.1085(14)<br>2.2109(16)<br>2.0845(15) | 7.2571(3)<br>7.6017(3) | $J = -0.33 \text{ cm}^{-1}$<br>$\Theta = -0.017\text{K}$ | 46 |
| $[\text{Co}(2,9\text{-dmphen})(\text{dca})_2]_n$  |   | 2.1707(15)<br>2.1884(16) | 2.1491(17)<br>2.1097(18)<br>2.0871(18)<br>2.1269(18) | 7.389(1)<br>7.718(1)   | $J = -0.03 \text{ cm}^{-1}$<br>$\Theta = -0.005\text{K}$ | 46 |
| $[\text{Co}(\text{dca})_2(\text{pypz})]_n$        |  | 2.166(2)<br>2.130(3)     | 2.130(2)<br>2.123(3)<br>2.107(3)<br>2.093(3)         | 8.899 Å                | –                                                        | 16 |

| double $\mu_{1,5}$ -dca + double $\mu_{1,3,5}$ -dca       |   |                                                                                    |                                                                |                                                                                                                                        |                        |                                                                                                                                |
|-----------------------------------------------------------|---|------------------------------------------------------------------------------------|----------------------------------------------------------------|----------------------------------------------------------------------------------------------------------------------------------------|------------------------|--------------------------------------------------------------------------------------------------------------------------------|
| [Co(dca) <sub>2</sub> (H <sub>2</sub> O)]·phz             |   | 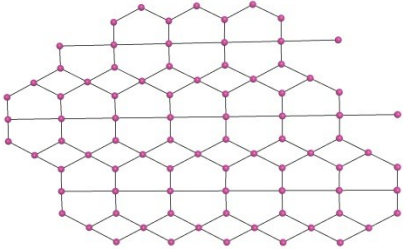 | Co(2)–<br>Owoda =<br>2.049(2)<br>Co(2)–<br>Owoda =<br>2.049(2) | Co(1)<br>2.080(2)<br>2.086(2)<br>2.213(2)<br>2.080(2)<br>2.086(2)<br>2.213(2)<br>Co(2)<br>2.121(2)<br>2.163(2)<br>2.121(2)<br>2.163(2) | 7.4110<br>9.7995       | $\mu_{\text{Co}} = 4.84\mu_{\text{B}}$<br>36                                                                                   |
| $\mu_{1,5}$ -dca + $\mu_{1,3,5}$ -dca                     |   |                                                                                    |                                                                |                                                                                                                                        |                        |                                                                                                                                |
| [Co(pzdo)(dca) <sub>2</sub> ]                             | - |                                                                                    | Co–<br>O=2.124(4)<br>Co–<br>O=2.124(4)                         | Co(1)<br>2.100(3)<br>2.100(3)<br>2.100(3)<br>2.100(3)<br>Co(2)<br>2.179(4)<br>2.179(4)                                                 | 7.499 Å                | $\Theta = -9.4$ K<br>$C = 3.17$ cm <sup>3</sup> mol <sup>-1</sup> K<br>44                                                      |
| [Co <sub>2</sub> (modo) <sub>2</sub> (dca) <sub>4</sub> ] | - |                                                                                    | Co–<br>O=2.122(2)<br>Co–<br>O=2.122(2)                         | 2.065(2)<br>2.065(2)<br>2.178(2)<br>2.089(2)                                                                                           | 5.803,<br>7.877        | $C = 6.61$ cm <sup>3</sup> mol <sup>-1</sup><br>K<br>$\Theta = -33.5$ K<br>44                                                  |
| [Co(pydz) <sub>2</sub> (dca) <sub>2</sub> ] <sub>n</sub>  | - |                                                                                    | 2.140(3)                                                       | 2.122(2)<br>2.088(2)<br>2.122(2)<br>2.088(2)<br>2.231(3)<br>2.231(3)                                                                   | 7.3474(2)<br>6.0490(6) | $C = 3.50$ cm <sup>3</sup> K mol <sup>-1</sup><br>1<br>$\Theta = -18.11$ K<br>$\mu_{\text{eff}} = 5.29$ $\mu_{\text{B}}$<br>19 |

| double $\mu_{1,5}$ -dca + ligand                                               |                                                                                    |                                                                                                       |                                                      |                                                         |                                                                         |    |
|--------------------------------------------------------------------------------|------------------------------------------------------------------------------------|-------------------------------------------------------------------------------------------------------|------------------------------------------------------|---------------------------------------------------------|-------------------------------------------------------------------------|----|
| [Co(bnzd)(dca) <sub>2</sub> ] <sub>n</sub>                                     | 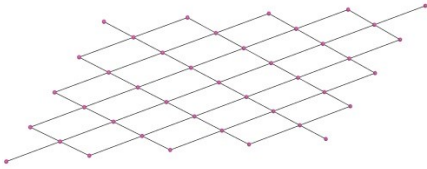 | 2.1895(16)<br>2.1895(16)                                                                              | 2.1173(16)<br>2.1173(16)<br>2.0996(17)<br>2.0996(17) | 7.293<br>though dca<br>12.941<br>through<br><i>bnzd</i> | $J = -3.38$ K<br>weak<br>antiferromagnetic<br>interaction               | 29 |
| {[Co(L <sup>7</sup> ) <sub>2</sub> (dca)](OH)(gly) <sub>2</sub> } <sub>n</sub> |  | 2.182<br>2.163                                                                                        | 2.140<br>2.140<br>2.163<br>2.163                     | 8.8 though<br>dca<br>14.5 though<br>ligand              | –                                                                       | 37 |
| [Co(3bpo)(dca) <sub>2</sub> ] <sub>n</sub>                                     |   | 2.176(4)<br>2.160(4)                                                                                  | 2.091(4)<br>2.103(5)<br>2.136(4)<br>2.115(4)         | 7.383(6)                                                | it is impossible to fit<br>the magnetic data of<br>2-D Co <sup>II</sup> | 41 |
| [Co(btm) <sub>2</sub> (dca)]ClO <sub>4</sub>                                   |  | 2.146(5)<br>2.140(5)<br>2.151(5)<br>2.143(5)<br>Co(2)<br>2.156(6)<br>2.156(6)<br>2.136(6)<br>2.136(6) | 2.084(5)<br>2.072(5)                                 | 8.539(2)<br>8.910(3)                                    | weak<br>antiferromagnetic<br>interaction                                | 42 |

**L<sup>6</sup>**= pyridinium-4-olate; **L<sup>7</sup>**= bis[3,5-dimethyl-4-(49-pyridyl)pyrazol-1-yl]methane; **bzim** = benzimidazole; **pte** = 1-(2,4-difluorophenyl)-2-(1H-1,2,4-triazol-1-yl)ethanone, **bnzd**= benzidine; **4cypy**= 4-cyanopyridine, **dmdpy**= 5,5'-dimethyl-2,2'-dipyridine; **ambzim**= 2-aminobenzimidazole; **4NOpy**= 4-(N-tert-butyloxylamino)pyridine; **pypz**= 3,5-dimethyl-1-(2-pyridyl)pyrazole; **phz**= phenazine; **atz**= 2-amino-

1,3,5-triazine; **bim**=1-benzylimidazole, **bmim**= 1-benzyl-2-methylimidazole; **mepyz**= methylpyrazine; **3bpo**= 2,5-bis(3-pyridyl)-1,3,4-oxadiazole; **btrm**= 1,2-bis(1,2,4-triazole-1-yl)methane; **pzdo**= pyrazine dioxide; **modo**= 2,3,5-trimethylpyrazine-dioxide; **phen**= 1,10-phenanthroline; **2,9-dmphen**= 2,9-dimethylphenanthroline

27. S. Wang, L. Wang, B. Li, Y. Zhang, *J. Chem. Crystallogr.*, 2009, **39**, 221–224.
28. L. Zhang, Y. Ling, A.-X. Hu, T.-T. Yao, J. Li, *Inorg. Chim. Acta*, 2009, **362**, 4867–4874.
29. S. Khan, S. Roy, K. Bhar, R. Ghosh, C.-H. Lin, J. Ribas, B. Kumar Ghosh, *Inorg. Chim. Acta*, 2013, **398**, 40–45
30. M. Du, Q. Wang, Y. Wang, X.-J. Zhao, J. Ribas, *J. Solid State Chem.*, 2006, **179**, 3926–3936
31. P. M. van der Werff, S. R. Batten, P. Jensen, B. Moubaraki, K. S. Murray, E. H.-K. Tan, *Polyhedron*, 2001, **20**, 1129–1138
32. L. B. Lopes, C.C. Correça, G.P. Guedes, M.G.F. Vaz, R. Diniz, F. C. Machado, *Polyhedron*, 2013, **50**, 16–21
33. A. Das, B. Bhattacharya, D. Kumar Maity, A. Halder, D. Ghoshal, *Polyhedron*, 2016, **117**, 585–591.
34. L. Zheng, *Journal of Chemistry*, 2013, 1-10.
35. H. Ogawa, K. Mori, K. Murashima, S. Karasawa, N. Koga, *Inorg. Chem.* 2016, **55**, 717–728.
36. A. M. Kutasi, S. R. Batten, B. Moubaraki, K. S. Murray, *J. Chem. Soc., Dalton Trans.*, 2002, 819–821.
37. M. Du, X.-G. Wang, Z.-H. Zhang, L.-F. Tang, X.-J. Zhao, *CrystEngComm*, 2006, **8**, 788–793.
38. J. Palion-Gazda, T. Klemens, B. Machura, J. Vallejo, F. Lloret, M. Julve, *Dalton Trans.*, 2015, **44**, 2989–2992.
39. A. Świtlicka-Olszewska, J. Palion-Gazda, T. Klemens, B. Machura, J. Vallejo, J. Cano, F. Lloret, M. Julve, *Dalton Trans.*, 2016, **45**, 10181–10193.
40. A. M. Kutasi, A. R. Harris, S. R. Batten, B. Moubaraki, K. S. Murray, *CrystGrowth&Des.*, 2004, **4**, 605-610.
41. M. Du, Q. Wang, C.P. Li, X.-J. Zhao, J. Ribas, *CrystalGrwoth&Des.*, 2010, **10**, 3285– 3296.
42. X.-Y. Chen, P. Cheng, S.-P. Yan, D.-Z. Liao, Z.-H. Jiang, *Z. Anorg. Allg. Chem.* 2005, **631**, 3104–3107
43. H.-L. Sun, S. Gao, B.-Q. Ma, G. Su, *Inorg. Chem.*, 2003, **42**, 53995404.
44. H.-L. Sun, Z.-M. Wang, S. Gao, *Inorg. Chem.*, 2005, **44**, 2169–2176

### 3. The HFEPR and FIRMS spectra

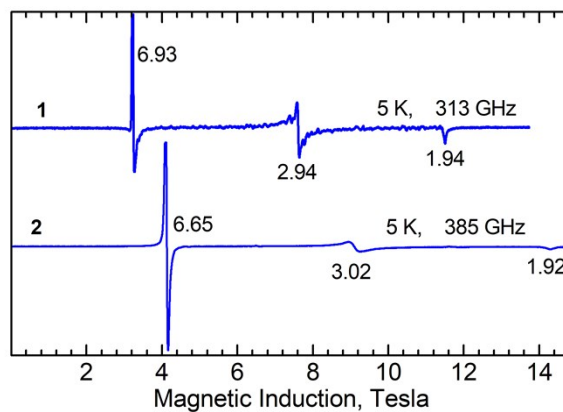

**Figure S8.** Blue traces: HF EPR spectra of compounds **1** and **2** recorded at similar conditions.

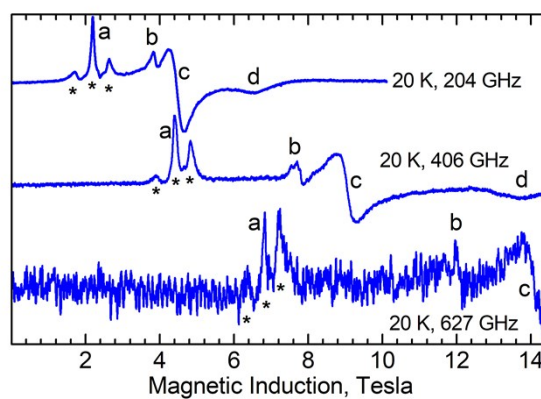

**Figure S9.** Blue traces: HF EPR spectra of compound **3**.

#### 4. Selected AC susceptibility data

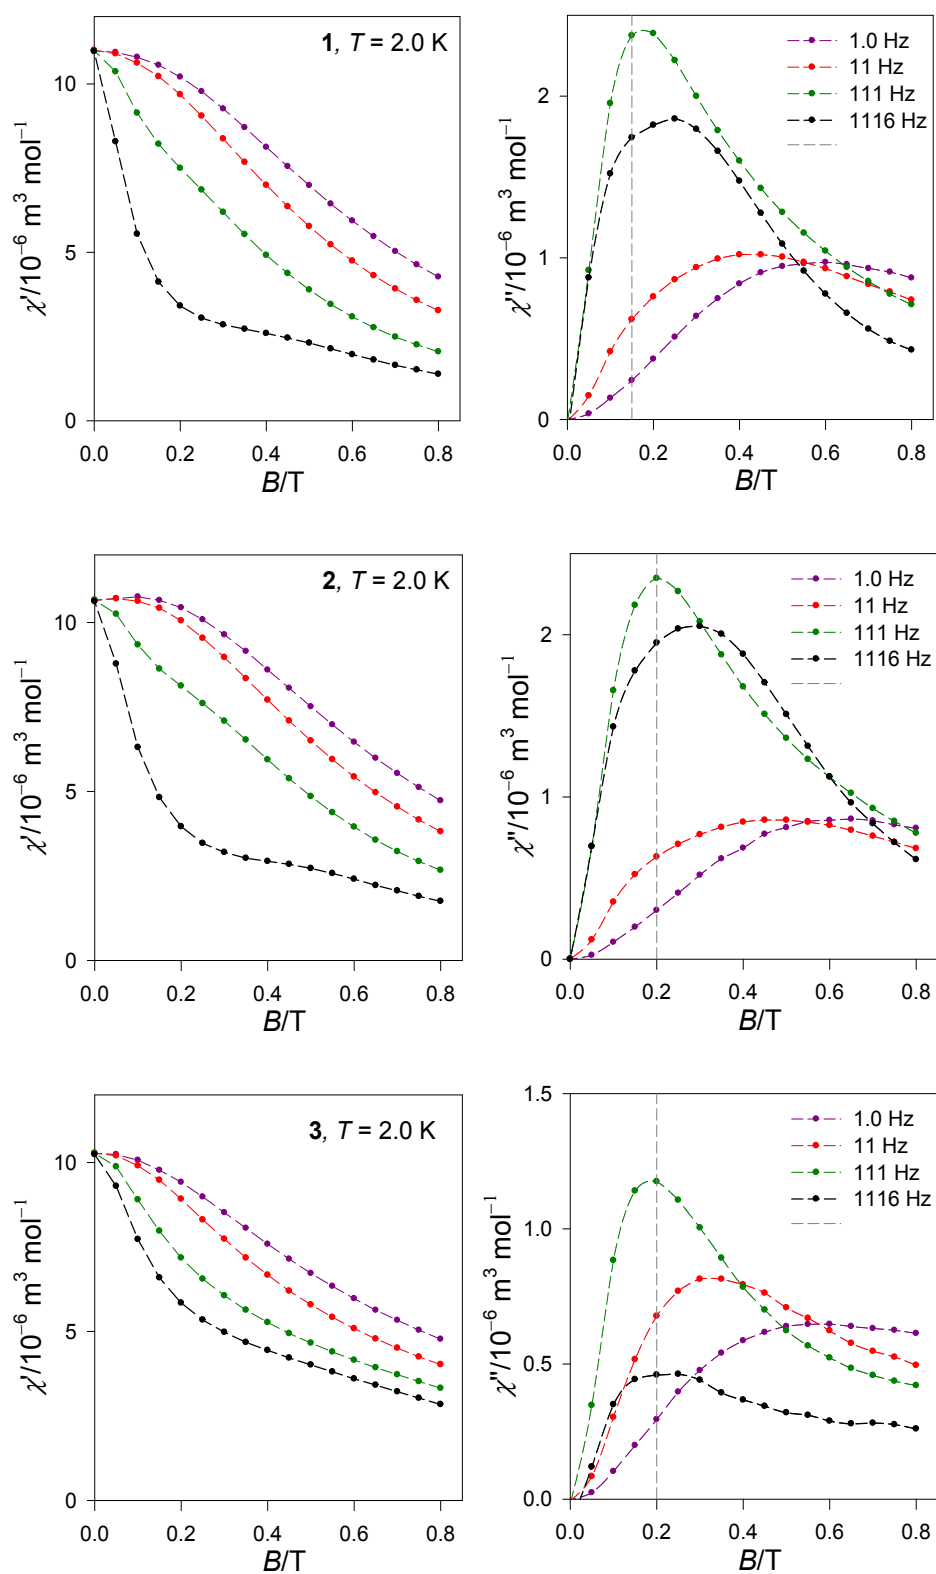

**Figure S10.** Field dependence of the AC susceptibility for **1** through **3** at  $T = 2.0$  K for a set of trial frequencies. Lines – guide for eyes.



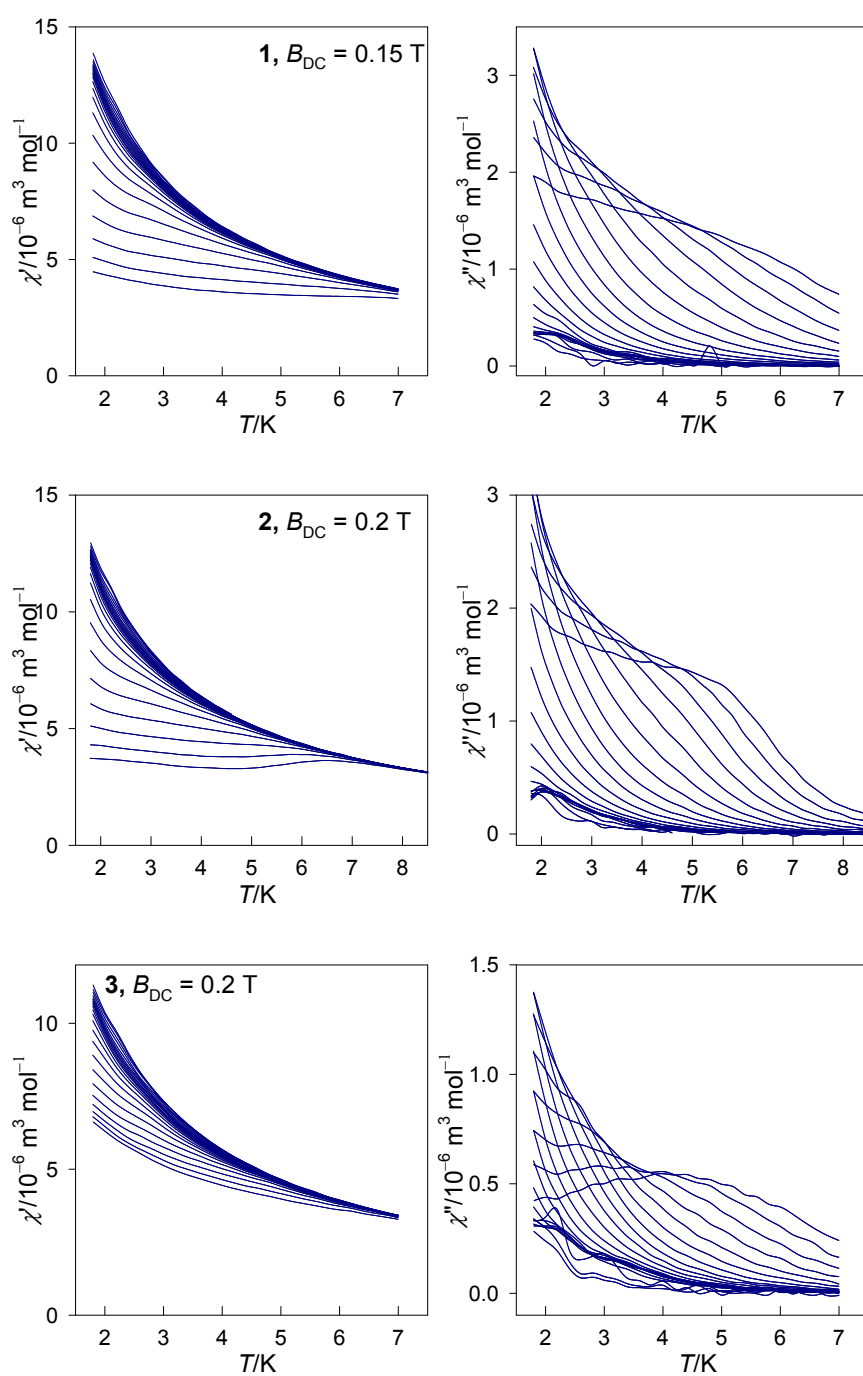

**Figure S11.** Temperature dependence of the AC susceptibility for **1** through **3** at  $B_{DC} = 0.2$  T for 22 frequencies of the oscillating field.

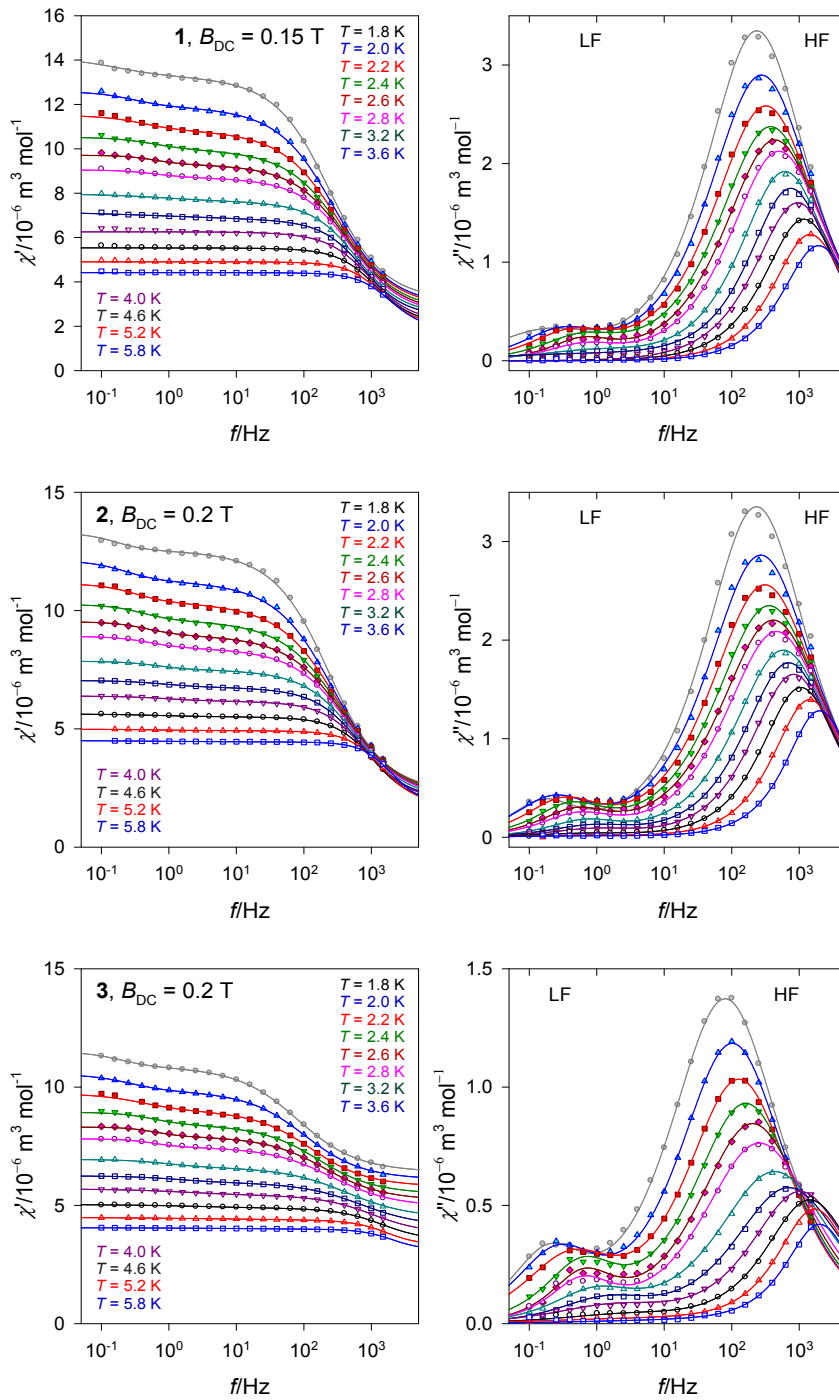

**Figure S12.** Frequency dependence of the AC susceptibility at  $B_{DC} = 0.2$  T. Lines – fitted, using the two-set Debye model.

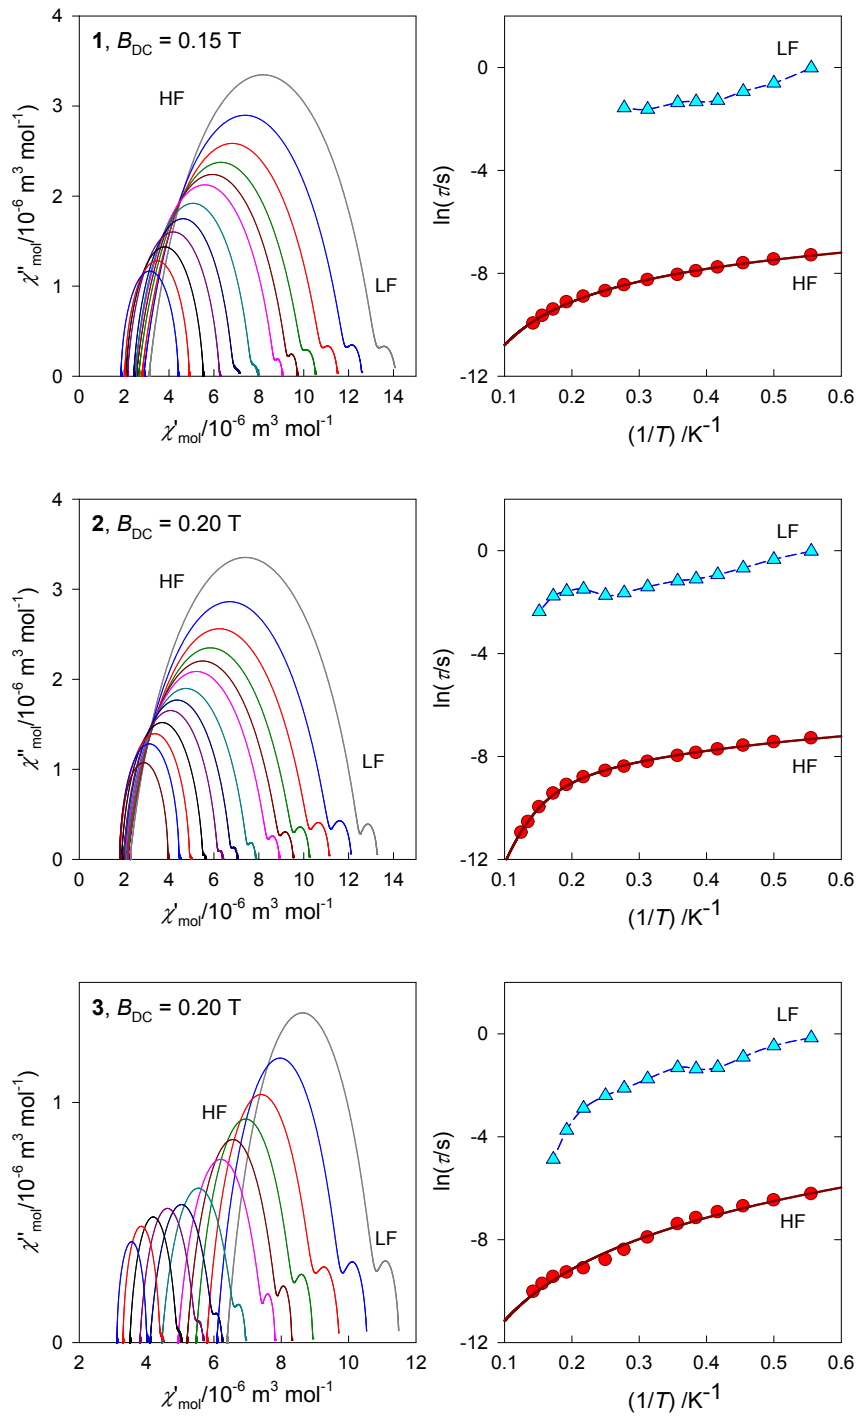

**Figure S13.** Argand plot (left) and the Arrhenius-like plot (right). Solid line – fitted with Raman-like and phonon-bottleneck terms  $\tau^{-1} = CT^n + FT^l$ .

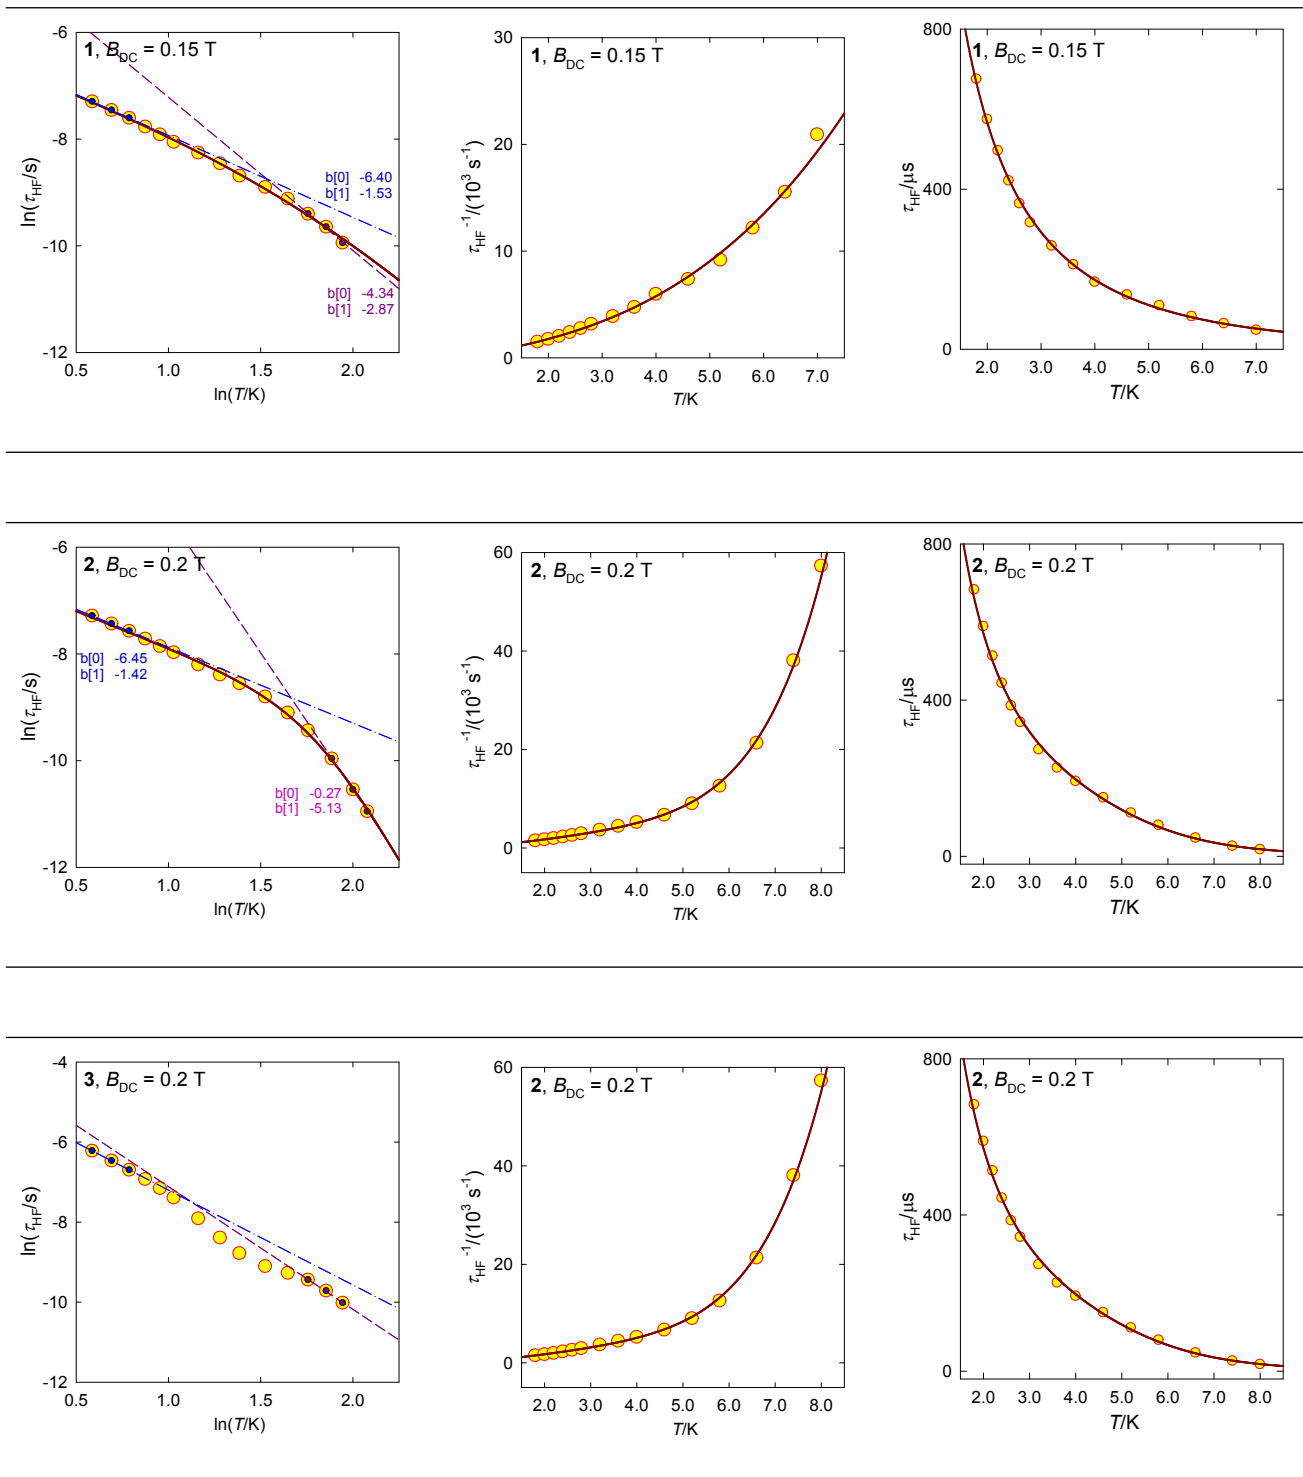

**Figure S14.** Various dependences of the high-frequency relaxation time. Dashed (dot-dashed) lines – linear fits to the high-temperature (low-temperature) windows. Solid – combined Raman-like and phonon-bottleneck terms.
